# Supplementary material for: Mercury source changes and food web shifts alter contamination signatures of predatory fish from Lake Michigan
Source: PubMed Central journal article supplement (PMC6876223; doi:10.1073/pnas.1907484116), 2019-11-04
Supplement: pnas.1907484116.sapp.pdf [file pnas.1907484116.sapp.pdf]

1  
2  
3  
4  
5  
6  
7  
8  
9  
10  
11  
12  
13  
14  
15  
16  
17  
18  
19  
20  
21  
22  
23

## Supplementary Information for

### **Mercury Source Changes and Food Web Shifts Alter Contamination Signatures of Predatory Fish from Lake Michigan**

Ryan F. Lepak, Joel C. Hoffman, Sarah E. Janssen, David P. Krabbenhoft, Jacob M. Ogorek, John F. DeWild, Michael T. Tate, Christopher L. Babiarz, Runsheng Yin, Elizabeth W. Murphy, Daniel R. Engstrom and James P. Hurley

James P. Hurley

Email: [jphurley@wisc.edu](mailto:jphurley@wisc.edu)

#### **This PDF file includes:**

- Supplementary text
- Equation S1
- Figs. S1 to S5
- Tables S1 to S5
- References for SI reference citations

#### **Other supplementary materials for this manuscript include the following:**

None

24 **Supplementary Information Text**

25 **Lipid correction model for  $\delta^{13}\text{C}$ .** Lipid correction of  $\delta^{13}\text{C}$  is essential in fish with widely varying  
26 lipid content because the formation of lipids results in a negative  $\delta^{13}\text{C}$  fractionation which can  
27 affect the bulk signature when comparing between individual fish and species. To better  
28 ascertain the carbon energy pathways of the fish, various correctional methods are used based  
29 on either analytical or mathematical methods<sup>1,2</sup>. Here, the latter is used and in the absence of  
30 lipid content, C:N<sub>bulk</sub> ratio is used as a proxy as suggested by Fry et al<sup>3</sup>.

31

32 
$$\delta^{13}\text{C}_{lipid\ free} = \delta^{13}\text{C}_{bulk} + (\Delta\delta^{13}\text{C}_{lipid} * (C:N_{lipid\ free} - C:N_{bulk}))/C:N_{bulk}$$
 (Equation S1)

33

34 Where the  $\Delta\delta^{13}\text{C}_{lipid}$  (-6.5 ‰) is the recommended constant for fish muscles with a C:N<sub>bulk</sub>  
35 ranging 3.4 to 15.3 and C:N<sub>lipid</sub> (3.4) is the molar ratio of free lipids. From this, percent lipids can  
36 be estimated using the molar C:N ratio<sup>1,2</sup>.

37

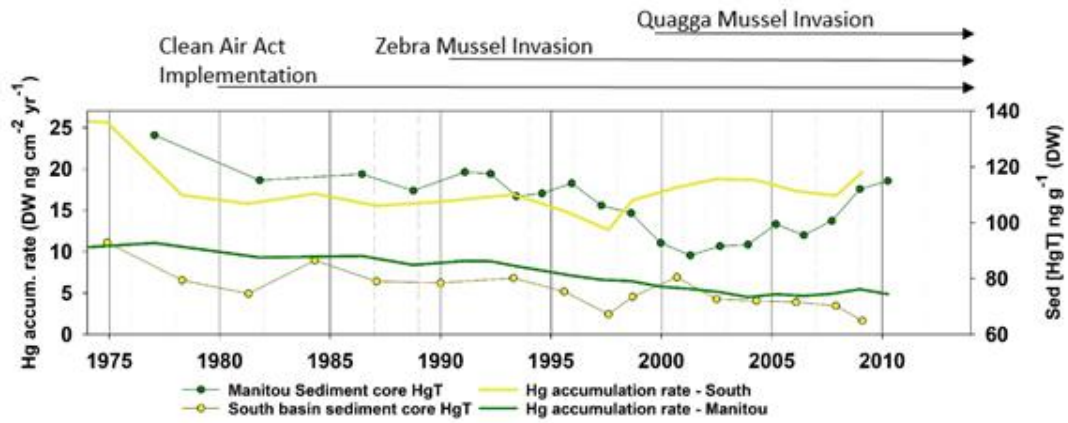

38

39 **Fig. S1. Total mercury (HgT ng g<sup>-1</sup> dry weight [DW]) and mercury (Hg) accumulation rate (ng cm<sup>-2</sup>**  
40 **yr<sup>-1</sup>) for two cores collected in Lake Michigan.**

41

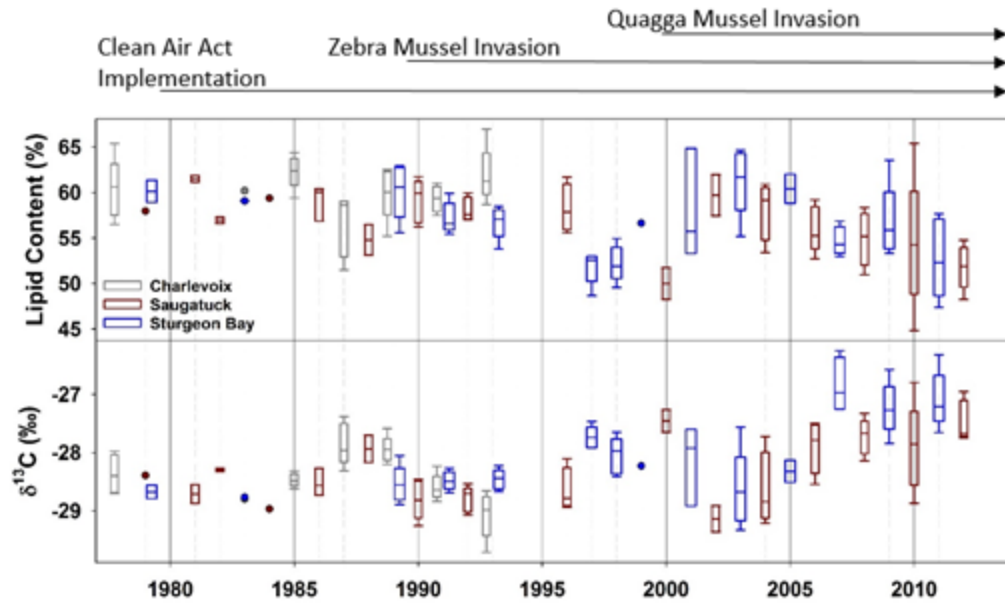

42

43 Figure S2. (Top): Percent lipid content in lake trout calculated by the methods mentioned in  
 44 supplemental text and elsewhere<sup>1,2</sup>. (Bottom): The measured  $\delta^{13}\text{C}$  in lake trout. Each data point  
 45 represents a composite of 5 lake trout, and the boxplots were used when 3-5 unique  
 46 composites were measured within a single year. Boxplots indicate the mean and quartiles of  
 47 the fish composites sampled in a site and year. Whiskers represent the 10th and 90th  
 48 percentiles. indicate the mean and quartiles of the fish composites sampled in a site and year.  
 49 Plot color indicates site with gray, red and blue representing Charlevoix, Saugatuck and  
 50 Sturgeon Bay respectively.

51

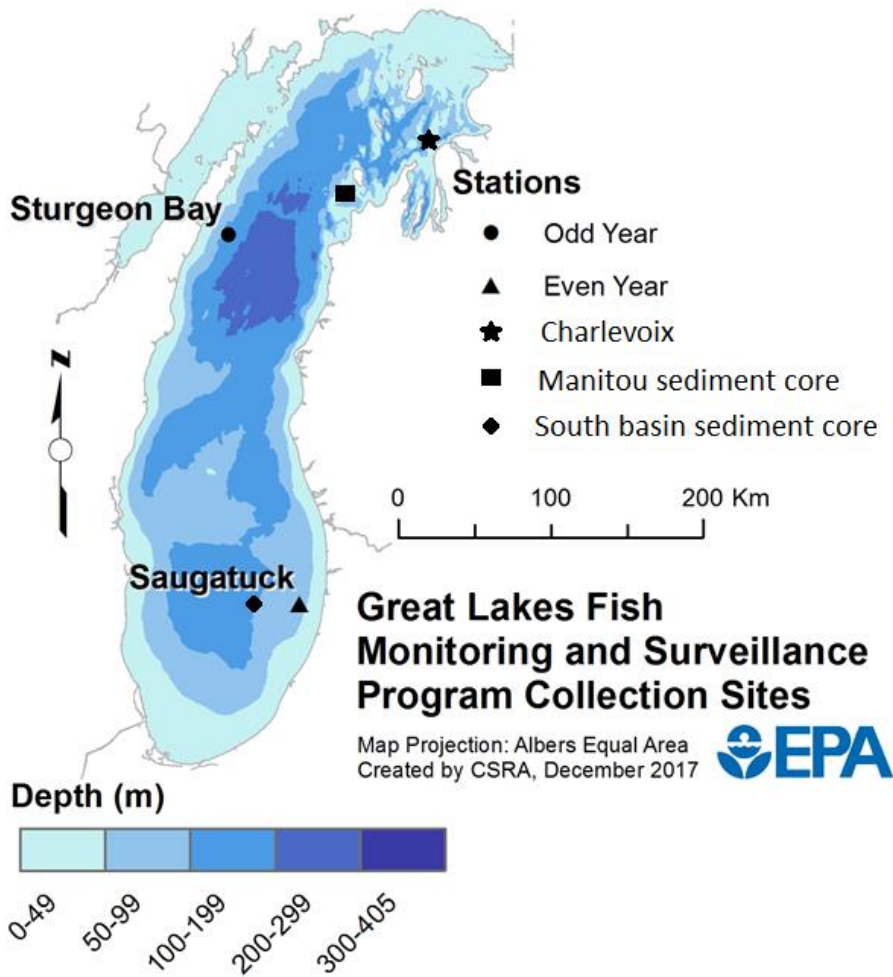

53  
 54 Fig. S3. Sampling map of the Great Lakes Fish Monitoring and Surveillance Program (GLFMSP)  
 55 collection sites along with sediment coring sites and bathymetry.

56

57

58

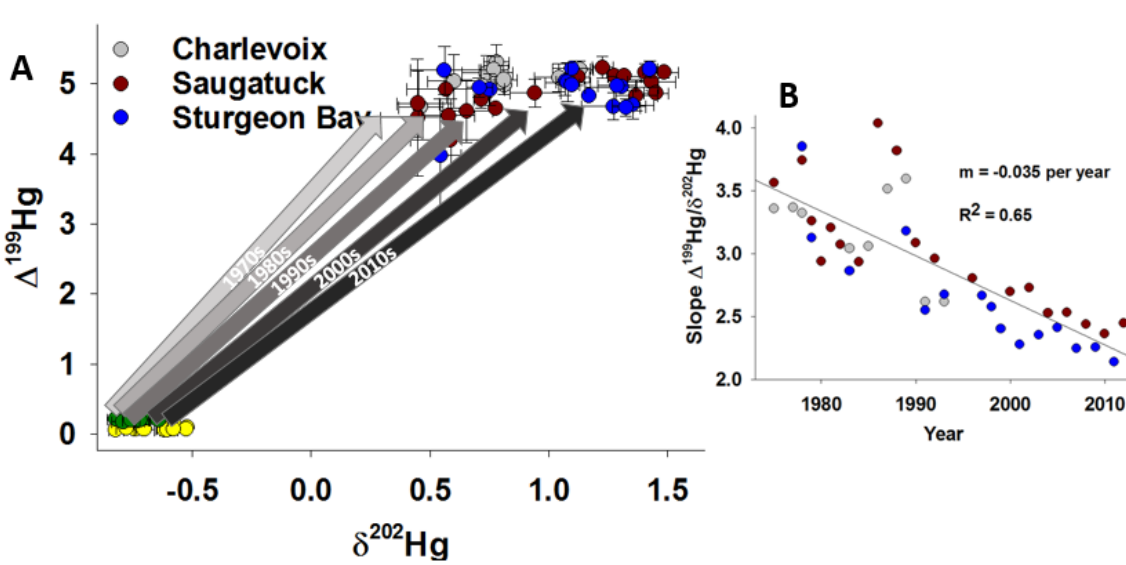

59

60 **Figure S4.** A temporal comparison of the sediments and fish represented in Figure 2. Here, the  
61 slope of  $\Delta^{199}\text{Hg}:\delta^{202}\text{Hg}$  (traditionally = 2.4) is used to predict whether sediment Hg might  
62 contribute to fish Hg. This slope is resultant of the fractionation in Hg isotopes due to  
63 photochemical demethylation<sup>4-7</sup>. When the slope is 2.4, the prediction can be made that the  
64 source of Hg in fish is linked to sediments (typically as sedimentary flux of MeHg). Here, only in  
65 the recent 2010s does this slope reflect 2.4 but we hypothesize this is not because sedimentary  
66 fluxes of MeHg affect fish Hg isotope ratios but rather that remnant sedimentary Hg now most  
67 closely resembles Hg bioaccumulated in fish from the environment. Panels A and B emphasize  
68 that prior to 2010s lake sediments were poor predictors of fish Hg sources.

69

70

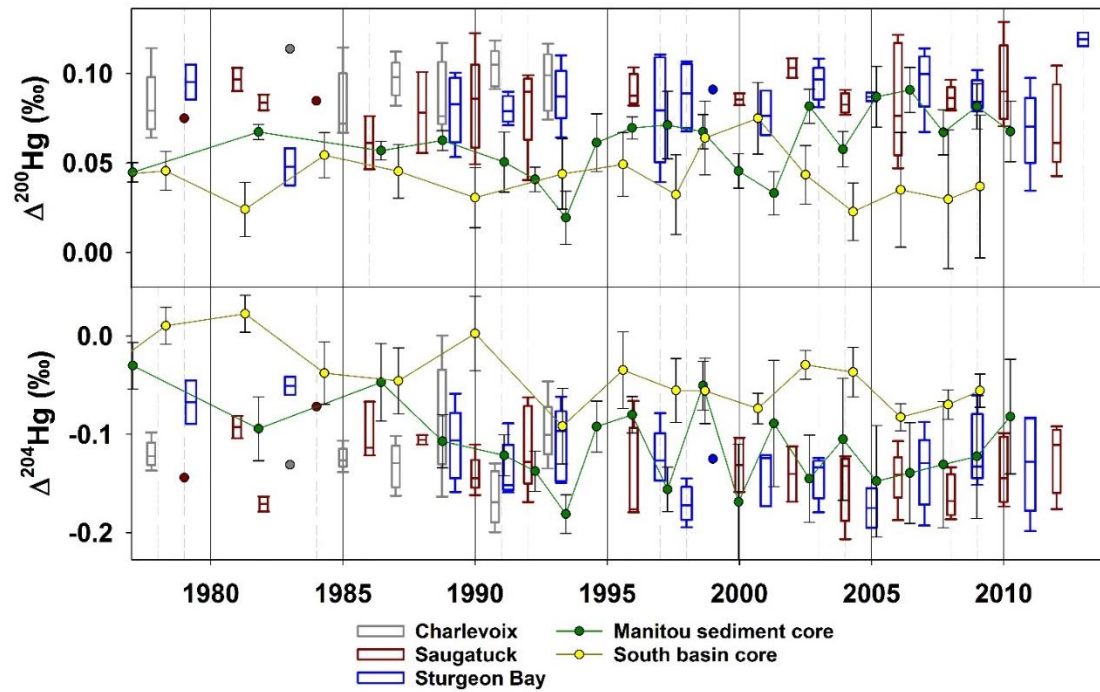

71  
 72 Figure S5. The even-mass independent fractionation values for lake trout and 2 sediment cores.  
 73 Each data point represents a composite of 5 lake trout and the boxplots were used when 3-5  
 74 unique composites were measured within a single year. Box plots indicate the mean and  
 75 quartiles of the fish composites sampled in a site and year. Plot color indicates site with gray,  
 76 red, and blue representing Charlevoix, Saugatuck and Sturgeon Bay respectively.

77

78 Table S1. Hg, C and N stable isotope ratios for the lake trout composites along with the d<sup>13</sup>C  
 79 lipid free, C:N<sub>bulk</sub> and length and weight measurements (next 3 pages) Site names LM-C, LM-St  
 80 and LM-Sa represent Charlevoix, Sturgeon Bay and Saugatuck, respectively. USGS ID is the  
 81 unique US Geological Survey identifier code.

82

| Site  | USGS ID      | Year | [HgT]<br>ng g <sup>-1</sup> | δ <sup>202</sup> Hg<br>‰ | Δ <sup>199</sup> Hg<br>‰ | Δ <sup>200</sup> Hg<br>‰ | Δ <sup>201</sup> Hg<br>‰ | Δ <sup>204</sup> Hg<br>‰ | δ <sup>13</sup> C<br>‰ | δ <sup>13</sup> C <sub>lipid-free</sub><br>‰ | δ <sup>15</sup> N<br>‰ | Molar C:N |
|-------|--------------|------|-----------------------------|--------------------------|--------------------------|--------------------------|--------------------------|--------------------------|------------------------|----------------------------------------------|------------------------|-----------|
| LM-C  | MSC712AA     | 1978 | 435.2                       | 0.70                     | 5.36                     | 0.11                     | 4.18                     | -0.13                    | -28.67                 | -24.46                                       | 14.50                  | 10.8      |
| LM-Sa | MSC727AA     | 1979 | 307.8                       | 0.60                     | 4.40                     | 0.06                     | 3.47                     | -0.11                    | -28.41                 | -24.51                                       | 14.03                  | 9.5       |
| LM-Sa | MSC728AA     | 1979 | 419.4                       | 0.52                     | 4.32                     | 0.08                     | 3.34                     | -0.12                    | -28.29                 | -24.49                                       | 14.05                  | 9.1       |
| LM-Sa | MSC731AA     | 1979 | 355.9                       | 0.61                     | 4.17                     | 0.06                     | 3.27                     | -0.06                    | -28.70                 | -24.53                                       | 14.20                  | 10.6      |
| LM-St | MSC736AA     | 1979 | 370.6                       | 0.64                     | 4.53                     | 0.08                     | 3.49                     | -0.12                    | -28.11                 | -24.38                                       | 14.25                  | 8.9       |
| LM-Sa | MSC744AA     | 1981 | 423.1                       | 0.66                     | 4.71                     | 0.11                     | 3.67                     | -0.17                    | -28.22                 | -24.34                                       | 13.54                  | 9.5       |
| LM-C  | MSC749AA     | 1983 | 244.2                       | 0.81                     | 4.98                     | 0.11                     | 3.81                     | -0.13                    | -28.80                 | -24.63                                       | 13.59                  | 10.6      |
| LM-St | MSC750AA-ave | 1983 | 392.3                       | 0.61                     | 4.54                     | 0.06                     | 3.48                     | -0.06                    | -28.77                 | -24.68                                       | 13.77                  | 10.2      |
| LM-Sa | MSC752AA     | 1984 | 388.3                       | 0.78                     | 4.65                     | 0.08                     | 3.57                     | -0.07                    | -28.97                 | -24.86                                       | 14.18                  | 10.3      |
| LM-C  | MSC753AA     | 1985 | 266.1                       | 0.84                     | 4.97                     | 0.11                     | 3.81                     | -0.13                    | -28.42                 | -24.31                                       | 13.96                  | 10.3      |
| LM-C  | MSC754AA     | 1985 | 247.3                       | 0.73                     | 4.78                     | 0.07                     | 3.65                     | -0.12                    | -28.52                 | -24.12                                       | 14.22                  | 11.7      |
| LM-C  | MSC755AA     | 1985 | 292.1                       | 0.77                     | 5.18                     | 0.07                     | 3.99                     | -0.14                    | -28.32                 | -23.99                                       | 13.97                  | 11.4      |
| LM-C  | MSC756AA     | 1985 | 230.3                       | 0.85                     | 5.01                     | 0.07                     | 3.88                     | -0.13                    | -28.49                 | -24.15                                       | 14.13                  | 11.4      |
| LM-C  | MSC757AA     | 1985 | 267.7                       | 0.86                     | 5.32                     | 0.09                     | 4.05                     | -0.11                    | -28.62                 | -24.13                                       | 13.56                  | 12.3      |
| LM-Sa | MSC758AA     | 1986 | 462.6                       | 0.51                     | 5.06                     | 0.08                     | 3.95                     | -0.07                    | -28.73                 | -24.54                                       | 13.81                  | 10.7      |
| LM-Sa | MSC759AA     | 1986 | 509.3                       | 0.42                     | 4.71                     | 0.05                     | 3.69                     | -0.11                    | -28.27                 | -24.36                                       | 13.78                  | 9.5       |
| LM-Sa | MSC760AA-ave | 1986 | 573.1                       | 0.54                     | 5.04                     | 0.06                     | 3.96                     | -0.12                    | -28.57                 | -24.41                                       | 14.09                  | 10.6      |
| LM-C  | MSC762AA     | 1987 | 498.3                       | 0.69                     | 5.32                     | 0.11                     | 4.12                     | -0.13                    | -27.62                 | -23.91                                       | 13.96                  | 8.9       |
| LM-C  | MSC763AA     | 1987 | 300.5                       | 0.45                     | 4.45                     | 0.09                     | 3.49                     | -0.10                    | -28.31                 | -24.23                                       | 14.13                  | 10.2      |
| LM-C  | MSC764AA     | 1987 | 407.3                       | 0.68                     | 5.23                     | 0.10                     | 4.06                     | -0.12                    | -28.02                 | -23.97                                       | 14.18                  | 10.1      |
| LM-C  | MSC765AA     | 1987 | 396.1                       | 0.68                     | 5.32                     | 0.10                     | 4.12                     | -0.16                    | -27.96                 | -23.89                                       | 14.31                  | 10.2      |
| LM-C  | MSC766AA     | 1987 | 282.5                       | 0.52                     | 4.86                     | 0.08                     | 3.80                     | -0.15                    | -27.38                 | -23.90                                       | 14.04                  | 8.2       |
| LM-Sa | MSC767AA     | 1988 | 554.5                       | 0.69                     | 5.06                     | 0.10                     | 3.93                     | -0.10                    | -27.70                 | -24.08                                       | 13.94                  | 8.6       |
| LM-Sa | MSC768AA     | 1988 | 536.3                       | 0.45                     | 4.78                     | 0.06                     | 3.78                     | -0.11                    | -28.17                 | -24.29                                       | 14.35                  | 9.4       |
| LM-C  | MSC769AA     | 1989 | 248.8                       | 0.41                     | 4.78                     | 0.08                     | 3.77                     | -0.10                    | -27.94                 | -23.62                                       | 14.16                  | 11.3      |
| LM-C  | MSC770AA-ave | 1989 | 233.2                       | 0.42                     | 4.67                     | 0.10                     | 3.67                     | -0.08                    | -27.94                 | -23.80                                       | 14.29                  | 10.5      |
| LM-C  | MSC771AA     | 1989 | 305.0                       | 0.42                     | 4.65                     | 0.12                     | 3.63                     | -0.16                    | -28.07                 | -23.91                                       | 14.62                  | 10.5      |
| LM-C  | MSC772AA     | 1989 | 273.6                       | 0.41                     | 4.66                     | 0.07                     | 3.66                     | -0.07                    | -28.20                 | -23.85                                       | 14.35                  | 11.5      |
| LM-C  | MSC773AA     | 1989 | 244.8                       | 0.63                     | 4.58                     | 0.08                     | 3.61                     | 0.00                     | -27.59                 | -23.81                                       | 13.91                  | 9.1       |
| LM-St | MSC774AA     | 1989 | 322.9                       | 0.71                     | 4.95                     | 0.09                     | 3.86                     | -0.06                    | -28.55                 | -24.47                                       | 14.16                  | 10.2      |
| LM-St | MSC775AA     | 1989 | 349.2                       | 0.74                     | 4.89                     | 0.07                     | 3.84                     | -0.10                    | -28.89                 | -24.54                                       | 14.21                  | 11.5      |
| LM-St | MSC776AA     | 1989 | 366.3                       | 0.78                     | 5.11                     | 0.10                     | 3.98                     | -0.16                    | -28.48                 | -24.28                                       | 14.34                  | 10.7      |
| LM-St | MSC777AA     | 1989 | 313.9                       | 0.65                     | 4.75                     | 0.08                     | 3.69                     | -0.11                    | -28.05                 | -24.24                                       | 14.40                  | 9.2       |
| LM-St | MSC778AA     | 1989 | 384.5                       | 0.66                     | 5.04                     | 0.05                     | 4.00                     | -0.13                    | -28.74                 | -24.35                                       | 14.26                  | 11.7      |
| LM-Sa | MSC779AA     | 1990 | 369.2                       | 0.87                     | 5.05                     | 0.05                     | 3.95                     | -0.11                    | -28.46                 | -24.53                                       | 14.10                  | 9.6       |
| LM-Sa | MSC780AA-ave | 1990 | 318.8                       | 0.91                     | 4.86                     | 0.09                     | 3.81                     | -0.14                    | -28.82                 | -24.60                                       | 14.03                  | 10.8      |
| LM-Sa | MSC781AA     | 1990 | 231.9                       | 1.12                     | 4.96                     | 0.07                     | 3.87                     | -0.14                    | -29.26                 | -24.97                                       | 14.28                  | 11.2      |
| LM-Sa | MSC782AA     | 1990 | 310.2                       | 0.86                     | 4.54                     | 0.09                     | 3.54                     | -0.16                    | -28.99                 | -24.84                                       | 14.60                  | 10.5      |
| LM-Sa | MSC783AA     | 1990 | 359.7                       | 0.96                     | 4.93                     | 0.12                     | 3.85                     | -0.15                    | -28.51                 | -24.65                                       | 13.96                  | 9.4       |
| LM-C  | MSC784AA     | 1991 | 194.2                       | 1.14                     | 5.21                     | 0.11                     | 4.10                     | -0.15                    | -28.64                 | -24.40                                       | 14.44                  | 10.9      |
| LM-C  | MSC785AA     | 1991 | 183.5                       | 1.10                     | 5.23                     | 0.12                     | 4.12                     | -0.20                    | -28.58                 | -24.47                                       | 14.10                  | 10.3      |
| LM-C  | MSC786AA     | 1991 | 216.9                       | 1.03                     | 5.25                     | 0.10                     | 4.16                     | -0.17                    | -28.23                 | -24.27                                       | 13.97                  | 9.7       |
| LM-C  | MSC787AA     | 1991 | 203.8                       | 0.87                     | 4.80                     | 0.09                     | 3.78                     | -0.13                    | -28.69                 | -24.66                                       | 14.30                  | 10.0      |
| LM-C  | MSC788AA     | 1991 | 191.3                       | 1.07                     | 4.95                     | 0.09                     | 3.87                     | -0.18                    | -28.84                 | -24.66                                       | 14.56                  | 10.7      |

83



84 Table S1. continued

| Site  | USGS ID      | Year | [HgT]<br>ng g <sup>-1</sup> | $\delta^{202}\text{Hg}$<br>‰ | $\Delta^{199}\text{Hg}$<br>‰ | $\Delta^{200}\text{Hg}$<br>‰ | $\Delta^{201}\text{Hg}$<br>‰ | $\Delta^{204}\text{Hg}$<br>‰ | $\delta^{13}\text{C}$<br>‰ | $\delta^{13}\text{C}_{\text{ipio-tree}}$<br>‰ | $\delta^{15}\text{N}$<br>‰ | Molar C:N |
|-------|--------------|------|-----------------------------|------------------------------|------------------------------|------------------------------|------------------------------|------------------------------|----------------------------|-----------------------------------------------|----------------------------|-----------|
| LM-St | MSC789AA     | 1991 | 297.9                       | 1.09                         | 5.14                         | 0.09                         | 4.03                         | -0.15                        | -28.27                     | -24.47                                        | 14.22                      | 9.1       |
| LM-St | MSC790AA-ave | 1991 | 250.7                       | 1.07                         | 5.17                         | 0.09                         | 4.04                         | -0.15                        | -28.55                     | -24.66                                        | 14.34                      | 9.5       |
| LM-St | MSC791AA     | 1991 | 287.2                       | 1.09                         | 4.97                         | 0.07                         | 3.89                         | -0.16                        | -28.69                     | -24.54                                        | 14.63                      | 10.5      |
| LM-St | MSC792AA     | 1991 | 215.9                       | 1.00                         | 4.71                         | 0.08                         | 3.71                         | -0.09                        | -28.49                     | -24.51                                        | 14.07                      | 9.8       |
| LM-St | MSC793AA     | 1991 | 296.2                       | 1.09                         | 5.15                         | 0.08                         | 4.02                         | -0.13                        | -28.39                     | -24.52                                        | 14.14                      | 9.4       |
| LM-Sa | MSC794AA     | 1992 | 321.6                       | 1.13                         | 5.21                         | 0.09                         | 4.08                         | -0.13                        | -28.70                     | -24.55                                        | 14.25                      | 10.5      |
| LM-Sa | MSC795AA     | 1992 | 369.0                       | 1.09                         | 5.20                         | 0.09                         | 4.06                         | -0.08                        | -28.69                     | -24.61                                        | 14.33                      | 10.2      |
| LM-Sa | MSC796AA     | 1992 | 307.8                       | 1.16                         | 4.99                         | 0.10                         | 3.88                         | -0.06                        | -28.96                     | -25.00                                        | 14.21                      | 9.8       |
| LM-Sa | MSC797AA     | 1992 | 285.0                       | 1.18                         | 4.95                         | 0.10                         | 3.86                         | -0.17                        | -29.07                     | -25.14                                        | 14.46                      | 9.6       |
| LM-Sa | MSC798AA     | 1992 | 245.3                       | 1.06                         | 5.15                         | 0.04                         | 3.97                         | -0.13                        | -28.54                     | -24.61                                        | 14.03                      | 9.6       |
| LM-C  | MSC799AA     | 1993 | 258.9                       | 1.08                         | 5.07                         | 0.12                         | 4.00                         | -0.05                        | -29.14                     | -24.89                                        | 14.80                      | 11.0      |
| LM-C  | MSC800AA-ave | 1993 | 287.8                       | 1.08                         | 5.08                         | 0.08                         | 3.97                         | -0.10                        | -28.66                     | -24.60                                        | 14.81                      | 10.1      |
| LM-C  | MSC801AA     | 1993 | 233.9                       | 1.22                         | 5.25                         | 0.10                         | 4.13                         | -0.13                        | -28.86                     | -24.63                                        | 14.56                      | 10.9      |
| LM-C  | MSC802AA     | 1993 | 182.2                       | 1.13                         | 5.38                         | 0.07                         | 4.16                         | -0.11                        | -28.98                     | -24.70                                        | 14.53                      | 11.2      |
| LM-C  | MSC803AA     | 1993 | 238.1                       | 1.15                         | 5.23                         | 0.10                         | 4.11                         | -0.10                        | -29.71                     | -25.02                                        | 14.49                      | 13.6      |
| LM-St | MSC804AA     | 1993 | 335.7                       | 0.98                         | 5.31                         | 0.06                         | 4.06                         | -0.10                        | -28.66                     | -24.63                                        | 14.62                      | 10.0      |
| LM-St | MSC805AA     | 1993 | 218.8                       | 1.08                         | 5.20                         | 0.11                         | 4.03                         | -0.06                        | -28.38                     | -24.49                                        | 14.72                      | 9.5       |
| LM-St | MSC806AA     | 1993 | 297.7                       | 1.20                         | 5.14                         | 0.09                         | 4.02                         | -0.09                        | -28.23                     | -24.56                                        | 14.15                      | 8.7       |
| LM-St | MSC807AA     | 1993 | 317.3                       | 1.10                         | 5.17                         | 0.09                         | 4.07                         | -0.15                        | -28.44                     | -24.51                                        | 14.52                      | 9.6       |
| LM-St | MSC808AA     | 1993 | 293.3                       | 1.11                         | 5.28                         | 0.09                         | 4.12                         | -0.15                        | -28.58                     | -24.60                                        | 14.51                      | 9.8       |
| LM-Sa | MSC810AA-ave | 1996 | 315.5                       | 1.27                         | 5.41                         | 0.10                         | 4.26                         | -0.18                        | -28.85                     | -24.56                                        | 14.89                      | 11.2      |
| LM-Sa | MSC811AA     | 1996 | 313.9                       | 1.23                         | 5.32                         | 0.09                         | 4.10                         | -0.17                        | -28.11                     | -24.30                                        | 14.33                      | 9.2       |
| LM-Sa | MSC812AA     | 1996 | 298.5                       | 1.17                         | 5.09                         | 0.08                         | 3.96                         | -0.18                        | -28.94                     | -24.87                                        | 14.61                      | 10.1      |
| LM-Sa | MSC813AA     | 1996 | 368.0                       | 1.23                         | 5.11                         | 0.09                         | 4.04                         | -0.07                        | -28.72                     | -24.80                                        | 14.54                      | 9.6       |
| LM-St | MSC814AA     | 1997 | 324.5                       | 1.19                         | 5.05                         | 0.11                         | 3.97                         | -0.15                        | -27.74                     | -24.14                                        | 13.89                      | 8.5       |
| LM-St | MSC815AA     | 1997 | 416.9                       | 1.12                         | 4.91                         | 0.06                         | 3.85                         | -0.08                        | -27.91                     | -24.30                                        | 14.81                      | 8.5       |
| LM-St | MSC816AA     | 1997 | 315.2                       | 1.08                         | 4.95                         | 0.08                         | 3.90                         | -0.15                        | -27.47                     | -24.21                                        | 14.80                      | 7.6       |
| LM-St | MSC817AA     | 1997 | 353.4                       | 1.09                         | 4.73                         | 0.04                         | 3.68                         | -0.13                        | -27.65                     | -24.14                                        | 14.48                      | 8.3       |
| LM-St | MSC818AA     | 1997 | 318.4                       | 0.92                         | 5.47                         | 0.11                         | 4.25                         | -0.12                        | -27.92                     | -24.35                                        | 14.46                      | 8.4       |
| LM-St | MSC819AA     | 1998 | 631.7                       | 1.12                         | 5.05                         | 0.09                         | 3.95                         | -0.14                        | -27.65                     | -24.32                                        | 14.46                      | 7.8       |
| LM-St | MSC820AA-ave | 1998 | 456.2                       | 1.14                         | 5.04                         | 0.10                         | 3.96                         | -0.17                        | -28.41                     | -24.65                                        | 14.62                      | 9.0       |
| LM-St | MSC821AA     | 1998 | 578.4                       | 1.08                         | 4.94                         | 0.11                         | 3.85                         | -0.16                        | -28.31                     | -24.71                                        | 14.84                      | 8.5       |
| LM-St | MSC822AA     | 1998 | 450.0                       | 1.09                         | 4.91                         | 0.07                         | 3.79                         | -0.18                        | -27.97                     | -24.46                                        | 14.30                      | 8.3       |
| LM-St | MSC823AA     | 1998 | 583.9                       | 1.07                         | 5.00                         | 0.07                         | 3.88                         | -0.19                        | -27.88                     | -24.39                                        | 14.20                      | 8.2       |
| LM-St | MSC824AA     | 1999 | 438.8                       | 1.17                         | 4.83                         | 0.09                         | 3.73                         | -0.13                        | -28.23                     | -24.34                                        | 15.13                      | 9.5       |
| LM-Sa | MSC825AA     | 2000 | 508.3                       | 1.26                         | 5.10                         | 0.08                         | 4.00                         | -0.16                        | -27.65                     | -24.15                                        | 14.48                      | 8.2       |
| LM-Sa | MSC826AA     | 2000 | 616.0                       | 1.29                         | 5.13                         | 0.09                         | 3.96                         | -0.10                        | -27.26                     | -24.04                                        | 14.51                      | 7.5       |
| LM-St | MSC827AA     | 2001 | 653.7                       | 1.20                         | 4.95                         | 0.07                         | 3.81                         | -0.17                        | -27.92                     | -24.10                                        | 14.80                      | 9.2       |
| LM-St | MSC828AA     | 2001 | 645.1                       | 1.24                         | 5.01                         | 0.08                         | 3.90                         | -0.12                        | -27.60                     | -23.97                                        | 14.77                      | 8.6       |
| LM-St | MSC830AA-ave | 2001 | 389.0                       | 1.48                         | 4.89                         | 0.09                         | 3.80                         | -0.12                        | -28.92                     | -24.39                                        | 14.69                      | 12.5      |
| LM-Sa | MSC831AA     | 2002 | 693.5                       | 1.37                         | 5.11                         | 0.11                         | 4.01                         | -0.11                        | -29.36                     | -25.05                                        | 14.32                      | 11.3      |
| LM-Sa | MSC832AA     | 2002 | 812.3                       | 1.27                         | 5.11                         | 0.10                         | 4.00                         | -0.17                        | -28.91                     | -24.95                                        | 14.68                      | 9.7       |
| LM-St | MSC833AA     | 2003 | 376.5                       | 1.46                         | 5.19                         | 0.10                         | 4.08                         | -0.15                        | -29.01                     | -24.56                                        | 14.31                      | 12.1      |
| LM-St | MSC834AA     | 2003 | 438.3                       | 1.44                         | 5.29                         | 0.11                         | 4.14                         | -0.13                        | -28.60                     | -24.31                                        | 14.68                      | 11.2      |

86 Table S1. continued

| Site  | USGS ID      | Year | [HgT]<br>ng g <sup>-1</sup> | $\delta^{202}\text{Hg}$<br>‰ | $\Delta^{199}\text{Hg}$<br>‰ | $\Delta^{200}\text{Hg}$<br>‰ | $\Delta^{201}\text{Hg}$<br>‰ | $\Delta^{204}\text{Hg}$<br>‰ | $\delta^{13}\text{C}$<br>‰ | $\delta^{13}\text{C}_{\text{lipid-free}}$<br>‰ | $\delta^{15}\text{N}$<br>‰ | Molar C:N |
|-------|--------------|------|-----------------------------|------------------------------|------------------------------|------------------------------|------------------------------|------------------------------|----------------------------|------------------------------------------------|----------------------------|-----------|
| LM-St | MSC835AA     | 2003 | 345.5                       | 1.41                         | 5.01                         | 0.08                         | 3.92                         | -0.13                        | -28.67                     | -24.44                                         | 14.38                      | 10.9      |
| LM-St | MSC836AA     | 2003 | 446.0                       | 1.44                         | 5.28                         | 0.10                         | 4.12                         | -0.18                        | -27.56                     | -23.78                                         | 14.36                      | 9.1       |
| LM-St | MSC837AA     | 2003 | 304.0                       | 1.38                         | 5.27                         | 0.09                         | 4.12                         | -0.12                        | -29.33                     | -24.82                                         | 13.77                      | 12.4      |
| LM-Sa | MSC838AA     | 2004 | 296.0                       | 1.44                         | 5.30                         | 0.09                         | 4.08                         | -0.21                        | -27.73                     | -24.09                                         | 13.61                      | 8.6       |
| LM-Sa | MSC839AA     | 2004 | 421.2                       | 1.38                         | 5.07                         | 0.08                         | 3.94                         | -0.13                        | -28.87                     | -24.80                                         | 13.73                      | 10.2      |
| LM-Sa | MSC841AA     | 2004 | 441.3                       | 1.41                         | 5.23                         | 0.08                         | 4.06                         | -0.12                        | -29.21                     | -24.98                                         | 14.19                      | 10.9      |
| LM-Sa | MSC842AA     | 2004 | 522.5                       | 1.39                         | 5.07                         | 0.08                         | 3.92                         | -0.13                        | -28.81                     | -24.70                                         | 14.67                      | 10.3      |
| LM-St | MSC843AA     | 2005 | 444.8                       | 1.23                         | 4.94                         | 0.09                         | 3.84                         | -0.16                        | -28.13                     | -24.07                                         | 14.17                      | 10.1      |
| LM-St | MSC844AA     | 2005 | 411.4                       | 1.34                         | 5.00                         | 0.08                         | 3.83                         | -0.19                        | -28.51                     | -24.20                                         | 13.74                      | 11.3      |
| LM-Sa | MSC845AA     | 2006 | 208.8                       | 1.29                         | 4.81                         | 0.05                         | 3.74                         | -0.14                        | -27.50                     | -23.91                                         | 13.09                      | 8.5       |
| LM-Sa | MSC846AA     | 2006 | 342.5                       | 1.39                         | 5.08                         | 0.06                         | 3.90                         | -0.19                        | -27.78                     | -24.00                                         | 13.67                      | 9.1       |
| LM-Sa | MSC847AA     | 2006 | 432.7                       | 1.55                         | 5.09                         | 0.11                         | 4.05                         | -0.14                        | -28.54                     | -24.56                                         | 14.11                      | 9.8       |
| LM-Sa | MSC848AA     | 2006 | 397.4                       | 1.48                         | 5.08                         | 0.12                         | 4.06                         | -0.11                        | -27.55                     | -23.80                                         | 13.18                      | 9.0       |
| LM-Sa | MSC849AA     | 2006 | 334.1                       | 1.46                         | 5.08                         | 0.08                         | 3.99                         | -0.14                        | -28.17                     | -24.08                                         | 13.55                      | 10.3      |
| LM-St | MSC850AA-ave | 2007 | 339.6                       | 1.37                         | 4.91                         | 0.07                         | 3.82                         | -0.19                        | -27.25                     | -23.44                                         | 14.34                      | 9.2       |
| LM-St | MSC851AA     | 2007 | 498.9                       | 1.35                         | 4.86                         | 0.11                         | 3.80                         | -0.12                        | -27.24                     | -23.53                                         | 14.86                      | 8.9       |
| LM-St | MSC852AA     | 2007 | 486.9                       | 1.06                         | 4.61                         | 0.10                         | 3.61                         | -0.09                        | -26.97                     | -23.06                                         | 14.19                      | 9.5       |
| LM-St | MSC853AA     | 2007 | 472.6                       | 1.21                         | 4.48                         | 0.10                         | 3.52                         | -0.15                        | -26.25                     | -22.65                                         | 14.12                      | 8.5       |
| LM-St | MSC854AA     | 2007 | 342.8                       | 1.38                         | 4.54                         | 0.10                         | 3.54                         | -0.13                        | -26.48                     | -22.81                                         | 15.04                      | 8.7       |
| LM-Sa | MSC855AA     | 2008 | 382.0                       | 1.47                         | 5.23                         | 0.09                         | 4.07                         | -0.13                        | -27.33                     | -23.88                                         | 13.60                      | 8.1       |
| LM-Sa | MSC856AA     | 2008 | 324.3                       | 1.49                         | 5.10                         | 0.09                         | 3.99                         | -0.19                        | -27.67                     | -24.06                                         | 13.32                      | 8.5       |
| LM-Sa | MSC857AA     | 2008 | 398.8                       | 1.58                         | 5.23                         | 0.08                         | 4.11                         | -0.17                        | -28.14                     | -24.11                                         | 13.02                      | 10.0      |
| LM-Sa | MSC858AA     | 2008 | 450.9                       | 1.41                         | 5.18                         | 0.10                         | 4.02                         | -0.18                        | -27.90                     | -23.97                                         | 12.92                      | 9.6       |
| LM-Sa | MSC859AA     | 2008 | 276.6                       | 1.47                         | 5.07                         | 0.08                         | 3.95                         | -0.15                        | -27.59                     | -23.81                                         | 13.15                      | 9.1       |
| LM-St | MSC860AA-ave | 2009 | 385.3                       | 1.44                         | 4.89                         | 0.08                         | 3.82                         | -0.15                        | -27.84                     | -23.41                                         | 15.10                      | 11.9      |
| LM-St | MSC861AA     | 2009 | 324.4                       | 1.39                         | 4.75                         | 0.09                         | 3.66                         | -0.10                        | -27.16                     | -23.45                                         | 14.60                      | 8.9       |
| LM-St | MSC862AA     | 2009 | 342.0                       | 1.22                         | 4.37                         | 0.08                         | 3.36                         | -0.06                        | -26.58                     | -22.94                                         | 14.57                      | 8.6       |
| LM-St | MSC863AA     | 2009 | 465.9                       | 1.33                         | 4.79                         | 0.10                         | 3.74                         | -0.13                        | -27.35                     | -23.46                                         | 14.42                      | 9.5       |
| LM-St | MSC864AA     | 2009 | 330.7                       | 1.40                         | 4.70                         | 0.08                         | 3.66                         | -0.14                        | -27.27                     | -23.44                                         | 13.98                      | 9.3       |
| LM-Sa | MSC865AA     | 2010 | 312.0                       | 1.39                         | 4.84                         | 0.08                         | 3.77                         | -0.14                        | -27.86                     | -24.10                                         | 13.07                      | 9.0       |
| LM-Sa | MSC866AA     | 2010 | 337.8                       | 1.44                         | 4.88                         | 0.10                         | 3.80                         | -0.17                        | -27.79                     | -24.19                                         | 13.10                      | 8.5       |
| LM-Sa | MSC867AA     | 2010 | 248.8                       | 1.44                         | 4.90                         | 0.13                         | 3.79                         | -0.11                        | -26.80                     | -23.86                                         | 13.11                      | 6.9       |
| LM-Sa | MSC868AA     | 2010 | 436.7                       | 1.45                         | 4.89                         | 0.07                         | 3.80                         | -0.16                        | -28.87                     | -24.30                                         | 13.44                      | 12.8      |
| LM-Sa | MSC869AA     | 2010 | 510.4                       | 1.53                         | 4.82                         | 0.09                         | 3.76                         | -0.10                        | -28.25                     | -24.54                                         | 14.36                      | 8.8       |
| LM-St | MSC870AA-ave | 2011 | 273.7                       | 1.40                         | 4.80                         | 0.10                         | 3.71                         | -0.13                        | -27.21                     | -23.66                                         | 13.90                      | 8.4       |
| LM-St | MSC871AA     | 2011 | 258.9                       | 1.27                         | 4.50                         | 0.07                         | 3.53                         | -0.08                        | -27.26                     | -23.29                                         | 13.62                      | 9.8       |
| LM-St | MSC872AA     | 2011 | 211.7                       | 1.36                         | 4.67                         | 0.07                         | 3.63                         | -0.08                        | -26.32                     | -23.17                                         | 14.33                      | 7.4       |
| LM-St | MSC873AA     | 2011 | 226.6                       | 1.27                         | 4.59                         | 0.08                         | 3.59                         | -0.20                        | -27.03                     | -23.67                                         | 13.38                      | 7.9       |
| LM-St | MSC874AA     | 2011 | 258.3                       | 1.32                         | 4.74                         | 0.03                         | 3.69                         | -0.16                        | -27.66                     | -23.77                                         | 13.99                      | 9.4       |
| LM-Sa | MSC875AA     | 2012 | 359.8                       | 1.40                         | 4.99                         | 0.08                         | 3.87                         | -0.14                        | -27.68                     | -23.94                                         | 12.75                      | 9.0       |
| LM-Sa | MSC876AA     | 2012 | 407.9                       | 1.30                         | 4.76                         | 0.06                         | 3.73                         | -0.10                        | -26.95                     | -23.73                                         | 13.32                      | 7.5       |
| LM-Sa | MSC877AA     | 2012 | 292.7                       | 1.51                         | 5.10                         | 0.10                         | 3.95                         | -0.09                        | -27.75                     | -24.23                                         | 12.64                      | 8.3       |
| LM-Sa | MSC878AA     | 2012 | 394.9                       | 1.30                         | 4.53                         | 0.06                         | 3.47                         | -0.18                        | -27.26                     | -23.81                                         | 12.56                      | 8.1       |
| LM-Sa | MSC879AA-ave | 2012 | 316.0                       | 1.33                         | 4.78                         | 0.04                         | 3.70                         | -0.11                        | -27.67                     | -24.05                                         | 12.75                      | 8.6       |

87  
88

89 **Table S2.** The Hg stable isotopes and HgT concentrations for 2 dated sediment cores collected  
 90 in Lake Michigan. UW ID is the unique University of Wisconsin Madison identifier code.

|                                            | Top<br>cm | Base<br>cm | Mid Date<br>year | UW ID      | [HgT]<br>ng g <sup>-1</sup> | Sedimentation rate<br>g cm <sup>-2</sup> yr <sup>-1</sup> | Hg accumulation rate<br>ng cm <sup>-2</sup> yr <sup>-1</sup> | $\delta^{202}\text{Hg}$<br>‰ | $\Delta^{199}\text{Hg}$<br>‰ | $\Delta^{200}\text{Hg}$<br>‰ | $\Delta^{201}\text{Hg}$<br>‰ | $\Delta^{204}\text{Hg}$<br>‰ |
|--------------------------------------------|-----------|------------|------------------|------------|-----------------------------|-----------------------------------------------------------|--------------------------------------------------------------|------------------------------|------------------------------|------------------------------|------------------------------|------------------------------|
| North Lake Michigan,<br>Manitou Pass, 2010 | 0.00      | 0.25       | 2010             | UW-DRE-001 | 115.0                       | 0.042                                                     | 4.9                                                          | -0.76                        | 0.20                         | 0.07                         | 0.16                         | -0.08                        |
|                                            | 0.25      | 0.50       | 2009             | UW-DRE-002 | 112.0                       | 0.049                                                     | 5.5                                                          | -0.64                        | 0.20                         | 0.08                         | 0.14                         | -0.12                        |
|                                            | 0.50      | 0.75       | 2008             | UW-DRE-003 | 100.7                       | 0.049                                                     | 4.9                                                          | -0.72                        | 0.20                         | 0.07                         | 0.16                         | -0.13                        |
|                                            | 0.75      | 1.00       | 2006             | UW-DRE-004 | 95.5                        | 0.049                                                     | 4.7                                                          | -0.70                        | 0.21                         | 0.09                         | 0.16                         | -0.14                        |
|                                            | 1.00      | 1.25       | 2005             | UW-DRE-005 | 99.4                        | 0.049                                                     | 4.8                                                          | -0.68                        | 0.22                         | 0.09                         | 0.14                         | -0.15                        |
|                                            | 1.25      | 1.50       | 2004             | UW-DRE-006 | 92.1                        | 0.049                                                     | 4.5                                                          | -0.69                        | 0.22                         | 0.06                         | 0.12                         | -0.11                        |
|                                            | 1.50      | 1.75       | 2003             | UW-DRE-007 | 91.6                        | 0.056                                                     | 5.1                                                          | -0.71                        | 0.21                         | 0.08                         | 0.11                         | -0.15                        |
|                                            | 1.75      | 2.00       | 2001             | UW-DRE-008 | 88.3                        | 0.062                                                     | 5.5                                                          | -0.79                        | 0.17                         | 0.03                         | 0.14                         | -0.09                        |
|                                            | 2.00      | 2.25       | 2000             | UW-DRE-009 | 92.7                        | 0.062                                                     | 5.8                                                          | -0.76                        | 0.19                         | 0.05                         | 0.14                         | -0.17                        |
|                                            | 2.25      | 2.50       | 1999             | UW-DRE-010 | 103.4                       | 0.062                                                     | 6.4                                                          | -0.76                        | 0.21                         | 0.07                         | 0.16                         | -0.05                        |
|                                            | 2.50      | 2.75       | 1997             | UW-DRE-011 | 106.2                       | 0.062                                                     | 6.6                                                          | -0.73                        | 0.19                         | 0.07                         | 0.13                         | -0.16                        |
|                                            | 2.75      | 3.00       | 1996             | UW-DRE-012 | 114.1                       | 0.062                                                     | 7.1                                                          | -0.82                        | 0.21                         | 0.07                         | 0.15                         | -0.08                        |
|                                            | 3.00      | 3.25       | 1995             | UW-DRE-013 | 110.5                       | 0.070                                                     | 7.7                                                          | -0.75                        | 0.24                         | 0.06                         | 0.19                         | -0.09                        |
|                                            | 3.25      | 3.50       | 1993             | UW-DRE-014 | 109.5                       | 0.075                                                     | 8.2                                                          | -0.78                        | 0.20                         | 0.02                         | 0.16                         | -0.18                        |
|                                            | 3.50      | 3.75       | 1992             | UW-DRE-015 | 117.5                       | 0.075                                                     | 8.8                                                          | -0.80                        | 0.20                         | 0.04                         | 0.10                         | -0.14                        |
|                                            | 3.75      | 4.00       | 1991             | UW-DRE-016 | 118.1                       | 0.075                                                     | 8.9                                                          | -0.82                        | 0.21                         | 0.05                         | 0.13                         | -0.12                        |
|                                            | 4.25      | 4.50       | 1989             | UW-DRE-017 | 111.5                       | 0.075                                                     | 8.4                                                          | -0.77                        | 0.24                         | 0.06                         | 0.13                         | -0.11                        |
|                                            | 4.75      | 5.00       | 1986             | UW-DRE-018 | 117.4                       | 0.081                                                     | 9.5                                                          | -0.77                        | 0.21                         | 0.06                         | 0.07                         | -0.05                        |
|                                            | 5.75      | 6.00       | 1982             | UW-DRE-019 | 115.2                       | 0.081                                                     | 9.3                                                          | -0.75                        | 0.23                         | 0.07                         | 0.14                         | -0.09                        |
|                                            | 6.75      | 7.00       | 1977             | UW-DRE-020 | 131.3                       | 0.084                                                     | 11.0                                                         | -0.73                        | 0.22                         | 0.04                         | 0.13                         | -0.03                        |
| South Lake Michigan,<br>H22-1, 2009        | 0.25      | 0.50       | 2009.1           | UW-DRE-37  | 64.9                        | 0.302                                                     | 19.6                                                         | -0.58                        | 0.06                         | 0.04                         | 0.01                         | -0.06                        |
|                                            | 1.25      | 1.50       | 2007.9           | UW-DRE-38  | 70.2                        | 0.239                                                     | 16.8                                                         | -0.61                        | 0.06                         | 0.03                         | 0.07                         | -0.07                        |
|                                            | 2.25      | 2.50       | 2006.1           | UW-DRE-39  | 71.6                        | 0.242                                                     | 17.3                                                         | -0.53                        | 0.06                         | 0.04                         | 0.04                         | -0.08                        |
|                                            | 3.25      | 3.50       | 2004.3           | UW-DRE-40  | 72.0                        | 0.259                                                     | 18.6                                                         | -0.61                        | 0.06                         | 0.02                         | 0.06                         | -0.04                        |
|                                            | 4.25      | 4.50       | 2002.5           | UW-DRE-41  | 72.6                        | 0.259                                                     | 18.8                                                         | -0.52                        | 0.09                         | 0.04                         | 0.07                         | -0.03                        |
|                                            | 5.25      | 5.50       | 2000.7           | UW-DRE-42  | 80.4                        | 0.221                                                     | 17.8                                                         | -0.57                        | 0.13                         | 0.07                         | 0.10                         | -0.07                        |
|                                            | 6.25      | 6.50       | 1998.7           | UW-DRE-43  | 73.5                        | 0.221                                                     | 16.2                                                         | -0.61                        | 0.13                         | 0.06                         | 0.10                         | -0.06                        |
|                                            | 6.75      | 7.00       | 1997.6           | UW-DRE-44  | 67.2                        | 0.188                                                     | 12.6                                                         | -0.62                        | 0.09                         | 0.03                         | 0.02                         | -0.06                        |
|                                            | 7.50      | 8.00       | 1995.6           | UW-DRE-45  | 75.3                        | 0.198                                                     | 14.9                                                         | -0.61                        | 0.08                         | 0.05                         | 0.05                         | -0.03                        |
|                                            | 8.50      | 9.00       | 1993.3           | UW-DRE-46  | 80.2                        | 0.211                                                     | 16.9                                                         | -0.57                        | 0.10                         | 0.04                         | 0.06                         | -0.09                        |
|                                            | 10.00     | 10.50      | 1990             | UW-DRE-47  | 78.4                        | 0.205                                                     | 16.0                                                         | -0.61                        | 0.09                         | 0.03                         | 0.08                         | 0.00                         |
|                                            | 11.00     | 11.50      | 1987.1           | UW-DRE-48  | 79.0                        | 0.197                                                     | 15.5                                                         | -0.70                        | 0.07                         | 0.05                         | 0.06                         | -0.05                        |
|                                            | 12.00     | 12.50      | 1984.3           | UW-DRE-49  | 86.5                        | 0.197                                                     | 17.0                                                         | -0.78                        | 0.08                         | 0.05                         | 0.05                         | -0.04                        |
|                                            | 13.00     | 13.50      | 1981.3           | UW-DRE-50  | 74.6                        | 0.212                                                     | 15.8                                                         | -0.82                        | 0.06                         | 0.02                         | 0.03                         | 0.02                         |
|                                            | 14.00     | 14.50      | 1978.3           | UW-DRE-51  | 79.4                        | 0.212                                                     | 16.8                                                         | -0.74                        | 0.07                         | 0.05                         | 0.02                         | 0.01                         |

91  
92

93 Table S3. The HgT stable isotope ratio triplicates quality assurance and quality control data.  
 94 Relative standard deviation and standard deviation are marked as RSD and sd respectively.

| USGS ID  | Year | [HgT] ng/g DW | RSD | $\delta$ Hg202 | sd   | $\Delta$ Hg199 | sd   | $\Delta$ Hg200 | sd   | $\Delta$ Hg 201 | sd   | $\Delta$ Hg204 | sd   |
|----------|------|---------------|-----|----------------|------|----------------|------|----------------|------|-----------------|------|----------------|------|
| MSC710AA | 1977 | 490.9         | 8%  | 0.83           | 0.01 | 5.31           | 0.08 | 0.11           | 0.00 | 4.11            | 0.04 | -0.15          | 0.01 |
| MSC820AA | 1998 | 456.2         | 1%  | 1.14           | 0.08 | 5.04           | 0.08 | 0.10           | 0.01 | 3.96            | 0.05 | -0.17          | 0.03 |
| MSC830AA | 2001 | 389.0         | 9%  | 1.48           | 0.09 | 4.95           | 0.03 | 0.10           | 0.01 | 3.87            | 0.00 | -0.20          | 0.00 |
| MSC720AA | 1978 | 764.6         | 2%  | 0.56           | 0.03 | 5.19           | 0.02 | 0.04           | 0.02 | 4.01            | 0.01 | -0.06          | 0.03 |
| MSC760AA | 1986 | 573.1         | 2%  | 0.54           | 0.01 | 5.04           | 0.01 | 0.06           | 0.02 | 3.96            | 0.02 | -0.12          | 0.04 |
| MSC770AA | 1989 | 233.2         | 7%  | 0.42           | 0.06 | 4.67           | 0.04 | 0.10           | 0.01 | 3.67            | 0.05 | -0.08          | 0.02 |
| MSC780AA | 1990 | 310.5         | 8%  | 0.95           | 0.10 | 4.87           | 0.01 | 0.09           | 0.01 | 3.82            | 0.02 | -0.14          | 0.02 |
| MSC790AA | 1991 | 250.7         | 5%  | 1.07           | 0.08 | 5.17           | 0.03 | 0.09           | 0.03 | 4.04            | 0.04 | -0.15          | 0.03 |
| MSC800AA | 1993 | 287.8         | 4%  | 1.08           | 0.05 | 5.08           | 0.03 | 0.08           | 0.02 | 3.97            | 0.01 | -0.10          | 0.01 |
| MSC810AA | 1996 | 315.5         | 4%  | 1.27           | 0.07 | 5.41           | 0.02 | 0.10           | 0.02 | 4.26            | 0.04 | -0.18          | 0.01 |
| MSC870AA | 2011 | 273.7         | 5%  | 1.40           | 0.05 | 4.80           | 0.04 | 0.10           | 0.01 | 3.71            | 0.01 | -0.13          | 0.03 |
| MSC730AA | 1979 | 919.7         | 4%  | 0.79           | 0.04 | 5.17           | 0.03 | 0.07           | 0.01 | 4.02            | 0.01 | -0.14          | 0.04 |
| MSC740AA | 1980 | 175.3         | 7%  | 0.48           | 0.02 | 4.15           | 0.02 | 0.09           | 0.02 | 3.25            | 0.01 | -0.07          | 0.02 |
|          |      |               |     |                |      |                |      |                |      |                 |      |                |      |
| IAEA407  |      | 100%          | 3%  | 0.56           | 0.03 | 1.08           | 0.02 | 0.03           | 0.02 | 0.87            | 0.02 | -0.03          | 0.02 |

95  
 96

97 **Table S4.** Triplicate quality assurance data for the carbon and nitrogen isotope analyses.

|          | $\delta^{13}\text{C}$ | sd  | $\delta^{15}\text{N}$ | sd  |
|----------|-----------------------|-----|-----------------------|-----|
| MSC820AA | -28.4                 | 0.1 | 14.6                  | 0.1 |
| MSC850AA | -27.3                 | 0.1 | 14.3                  | 0.1 |
| MSC879AA | -27.7                 | 0.0 | 12.8                  | 0.2 |
| MSC870AA | -27.2                 | 0.2 | 13.9                  | 0.2 |
| MSC830AA | -28.9                 | 0.2 | 14.7                  | 0.2 |
| MSC860AA | -27.8                 | 0.1 | 15.1                  | 0.3 |
| MSC841AA | -29.2                 | 0.0 | 14.2                  | 0.4 |

98

99

100 **Table S5.** Secchi depths for Lake Michigan. Raw data including locations may be found on the  
 101 U.S. EPA GLNPO, Great Lakes Environmental Database (cdx.epa.gov).

102

| Season | Year   | 2-yr av | sd  | Max  | Min | Season | Year   | 2-yr av | sd  | Max  | Min  |
|--------|--------|---------|-----|------|-----|--------|--------|---------|-----|------|------|
| Spring | 1983   | 9.6     | 2.1 | 11.6 | 7.5 | Spring | 2000   | 7.7     | 1.7 | 9.4  | 6.0  |
| Summer | 1983.5 | 9.8     | 1.8 | 11.7 | 8.0 | Summer | 2000.5 | 8.2     | 1.1 | 9.3  | 7.1  |
| Spring | 1984   | 9.8     | 2.6 | 12.4 | 7.2 | Spring | 2001   | 8.3     | 2.1 | 10.3 | 6.2  |
| Summer | 1984.5 | 9.9     | 3.1 | 13.1 | 6.8 | Summer | 2001.5 | 8.9     | 1.1 | 9.9  | 7.8  |
| Spring | 1985   | 10.4    | 1.9 | 12.4 | 8.5 | Summer | 2002.5 | 9.4     | 1.3 | 10.7 | 8.1  |
| Summer | 1985.5 | 10.3    | 3.0 | 13.3 | 7.4 | Spring | 2003   | 10.2    | 1.0 | 11.2 | 9.2  |
| Spring | 1986   | 9.9     | 2.2 | 12.1 | 7.7 | Summer | 2003.5 | 10.6    | 2.6 | 13.1 | 8.0  |
| Summer | 1986.5 | 9.5     | 3.8 | 13.3 | 5.8 | Spring | 2004   | 11.5    | 2.5 | 13.9 | 9.0  |
| Spring | 1987   | 9.1     | 2.6 | 11.8 | 6.5 | Summer | 2004.5 | 11.9    | 1.8 | 13.7 | 10.1 |
| Summer | 1987.5 | 9.4     | 1.3 | 10.7 | 8.0 | Spring | 2005   | 12.5    | 2.2 | 14.7 | 10.4 |
| Spring | 1988   | 8.8     | 1.3 | 10.1 | 7.5 | Summer | 2005.5 | 12.9    | 2.0 | 15.0 | 10.9 |
| Summer | 1988.5 | 8.5     | 1.5 | 9.9  | 7.0 | Spring | 2006   | 13.4    | 1.6 | 15.0 | 11.9 |
| Spring | 1989   | 8.3     | 1.4 | 9.8  | 6.9 | Summer | 2006.5 | 13.1    | 2.2 | 15.3 | 10.9 |
| Summer | 1989.5 | 8.8     | 2.0 | 10.8 | 6.9 | Spring | 2007   | 13.2    | 4.5 | 17.7 | 8.7  |
| Spring | 1990   | 8.5     | 2.3 | 10.7 | 6.2 | Summer | 2007.5 | 13.7    | 2.0 | 15.7 | 11.7 |
| Summer | 1990.5 | 8.4     | 2.3 | 10.6 | 6.1 | Spring | 2008   | 13.9    | 1.6 | 15.5 | 12.2 |
| Spring | 1991   | 7.5     | 1.9 | 9.4  | 5.6 | Summer | 2008.5 | 13.6    | 4.3 | 17.9 | 9.3  |
| Summer | 1991.5 | 7.8     | 1.1 | 8.9  | 6.6 | Spring | 2009   | 13.6    | 1.7 | 15.3 | 11.9 |
| Spring | 1992   | 7.3     | 2.5 | 9.9  | 4.8 | Summer | 2009.5 | 13.5    | 2.1 | 15.6 | 11.4 |
| Summer | 1992.5 | 7.2     | 1.4 | 8.5  | 5.8 | Spring | 2010   | 13.3    | 3.9 | 17.2 | 9.5  |
| Spring | 1993   | 6.9     | 2.4 | 9.4  | 4.5 | Summer | 2010.5 | 13.4    | 2.6 | 16.0 | 10.8 |
| Summer | 1993.5 | 7.1     | 1.0 | 8.1  | 6.2 | Spring | 2011   | 13.2    | 2.8 | 16.0 | 10.4 |
| Spring | 1994   | 7.1     | 1.2 | 8.3  | 6.0 | Summer | 2011.5 | 13.7    | 2.7 | 16.3 | 11.0 |
| Summer | 1994.5 | 7.6     | 1.6 | 9.2  | 6.0 | Spring | 2012   | 14.0    | 3.7 | 17.7 | 10.3 |
| Spring | 1995   | 7.8     | 1.1 | 8.9  | 6.7 | Summer | 2012.5 | 14.7    | 2.5 | 17.1 | 12.2 |
| Summer | 1995.5 | 8.5     | 1.5 | 10.0 | 7.1 | Spring | 2013   | 14.4    | 1.4 | 15.9 | 13.0 |
| Spring | 1996   | 8.4     |     | 8.4  | 8.4 | Summer | 2013.5 | 15.4    | 2.2 | 17.6 | 13.2 |
| Summer | 1996.5 | 8.4     | 1.9 | 10.3 | 6.5 | Spring | 2014   | 15.5    | 2.0 | 17.5 | 13.5 |
| Spring | 1997   | 8.2     | 2.3 | 10.4 | 5.9 | Summer | 2014.5 | 15.9    | 2.2 | 18.1 | 13.7 |
| Summer | 1997.5 | 8.3     | 1.4 | 9.7  | 6.9 | Spring | 2015   | 15.7    | 2.9 | 18.6 | 12.9 |
| Spring | 1998   | 7.9     | 3.0 | 10.9 | 4.9 | Summer | 2015.5 | 16.6    | 1.8 | 18.4 | 14.8 |
| Summer | 1998.5 | 7.8     | 2.2 | 10.0 | 5.5 | Spring | 2016   | 16.3    | 5.1 | 21.4 | 11.3 |
| Spring | 1999   | 7.6     | 1.9 | 9.5  | 5.6 | Summer | 2016.5 | 17.0    | 3.2 | 20.3 | 13.8 |
| Summer | 1999.5 | 7.9     | 1.0 | 8.9  | 7.0 | Spring | 2017   | 16.8    | 4.7 | 21.5 | 12.1 |

103

104

105

106

107

108

109

110

111

112 **References**

- 113 1. Hoffman, J. C., Sierszen, M. E. & Cotter, A. M. Fish tissue lipid-C:N relationships for  
114 correcting  $\delta^{13}\text{C}$  values and estimating lipid content in aquatic food-web studies. *Rapid*  
115 *Commun. Mass Spectrom.* 29, 2069–2077 (2015).
- 116 2. Turschak, B. A. Bunnell, D.; Czesny, S.; Höök, T. O.; Janssen, J.; Warner, D.; Bootsma, H.  
117 A., Nearshore energy subsidies support Lake Michigan fishes and invertebrates following  
118 major changes in food web structure. *Ecology* 95, 1243–1252 (2014).
- 119 3. Fry, B. Stable isotopic indicators of habitat use by Mississippi River fish. *J. North Am.*  
120 *Benthol. Soc.* 21, 676–685 (2002).
- 121 4. Bergquist, B. A. & Blum, J. D. Mass-dependent and -independent fractionation of Hg  
122 isotopes by photoreduction in aquatic systems. *Science* 318, 417–420 (2007).
- 123 5. Point, D. et al. Methylmercury photodegradation influenced by sea-ice cover in Arctic  
124 marine ecosystems. *Nat. Geosci.* 4, 188–194 (2011).
- 125 6. Lepak, Ryan F., Janssen, S. E.; Yin, R.; Krabbenhoft, D. P.; Ogorek, J. M.; DeWild, J. F.;  
126 Tate, M. T.; Holsen, T. M.; Hurley, J. P., "Factors Affecting Mercury Stable Isotopic  
127 Distribution in Piscivorous Fish of the Laurentian Great Lakes." *Environmental Science &*  
128 *Technology* 52.5 (2018): 2768-2776.
- 129 7. Rose, C. H., Ghosh, S., Blum, J. D. & Bergquist, B. A. Effects of ultraviolet radiation on  
130 mercury isotope fractionation during photo-reduction for inorganic and organic mercury  
131 species. *Chem. Geol.* 405, 102–111 (2015).
- 132
